# Supplementary material for: Mimics of ganglioside GM1 as cholera toxin ligands: replacement of the GalNAc residueElectronic supplementary information (ESI) available: synthetic details, product characterisations and full NOE contact list. See http://www.rsc.org/suppdata/ob/b2/b210503a/
Source: Royal Society of Chemistry journal article supplement (doi:10.1039/b210503a), 2003-02-05
Supplement: b210503a.doc [file b210503a.doc]

Supplementary Material for Organic & Biomolecular Chemistry

This journal is © The Royal Society of Chemistry 2003

Supplementary data

**Mimics of ganglioside GM1 as Cholera Toxin ligands: replacement of the GalNAc residue.**

Anna Bernardi, Daniela Arosio, Leonardo Manzoni, Helena Posteri, Donatella Potenza, Diego Monti, Jesus Jimenez-Barbero, Silvia Mari

#### Supplementary Information

The CHD fragment was arbitrarily numbered as reported below, to allow easier comparison with the native Gal unit of GM1.

Hydrogen atoms on Gal are indicated as Hnb, hydrogen’s atoms on GlcNAc are indicated as Hna; hydrogen atoms on the CHD ring are indicated as CHDn, or Hnc. Hydrogen atoms on NeuAc are indicated as Hnd; the -hydroxyacid chain substituents are indicated as L-H and L-CH3.

The synthesis of compounds **6** and **16** was described in *Eur. J. Org. Chem.*  1311-1317 (1999).

**Synthesis of the Gal-1,3-GlcNAc donor 8.**

**Synthesis of 10**

To a stirred solution of **9** (16.8 g, 48.36 mmol), under N2 , in dry DMF (242 ml) , imidazole ( 16.6 g, 241.8 mmol) and texyl-dimethylchlorosilane (13.2 ml, 67.04 mmol) were added. The reaction was monitored by TLC (AcOEt). The mixture was stirred for 22 h at room temperature then the solvent was evaporated. The residue was dissolved in AcOEt and the solution washed with saturated NH4Cl, water, dried and concentrated. To a stirred solution of the residue (23 g, 46.9 mmol) in dry MeOH (180ml), under N2, was added, a solution 1M of MeONa (20 ml, 0.04 mmol) in dry MeOH and stirring was continued for 1h. The reaction was monitored by TLC (8:2 CHCl3:MeOH). Amberlite IR-120 was added to pH 2, and the resin was then removed by filtration. The solution was finally concentrated to give **10** (87%).

1H-NMR ( CDCl3, 200MHz ): -1.5- (-1.3) (m, 6H, Si(CH3)2); -0.85-(-0.55) ( m, 12H, 4CH3, texyl); 0-0.2 (m, 1H, CH(CH3)2); 0.42 (s, 1H, NCOCH3); 1.3-2.4 (m, 6H); 3.15 (d, 1H, H1).

**Synthesis of 11.**

To a solution of **10** (14.2 g, 39 mmol) in dry CH3CN (220 ml) at 50°C, under N2 were added benzaldehyde dimethyl acetal (7.0 ml, 46.84mmol) and PPTS (981 mg, 3.9mmol). The reaction was monitored by TLC (8:2 CHCl3/MeOH). The reaction mixture was neutralised by addition of triethylamine and concentrated under reduced pressure. The residue was dissolved in AcOEt and the solution washed with water, dried and concentrated. The yellow solid was triturated in hot hhexane to give the product **11** (87%).

1H-NMR ( CDCl3, 200MHz ):0.12-0.23 (2s, 6H, Si(CH3)2); 0.80-0.95 (m, 12H, CH3, texyl); 1.67 (m, 1H, CH(CH3)2); 2.0 (s, 3H, CH3CON); 3.64-3.33 (m, 3H, H2, H3, H5); 3.78 (dd, 1H, H6, 4.16 ( dd, 1H, H4); 4.29 (dd, 1H, H6) 4.88 (d, 1H, H1, J1-2=9.2Hz);5.52 (s,1H,CHC6H5); 5.87 (d, 1H, NH, JNH-H2=8.2Hz); 7.05-7.28 (m, 5H); 5.18-5.32 (m, 1H, H3).

**Synthesis of 13.**

To a mixture of **11** ( 1g, 2.214 mmol) and **12** (1.41g, 2.878 mmol) grounded molecular sieves (ca. 100 mg) were added and the mixture was dried *in vacuo* for 30’. Under N2 CH2Cl2 was added and the solution was stirred for 15`. After this time TMSOTf (19.3 l, 0.221 mmol) was at 0°C. The reaction was monitored by TLC (3:7 hexane/AcOEt). The solution was stirred for 2 h, then addition of triethylamine was added and the solvent was evaporated. The residue was purified by flash chromatography (1:1 AcOEt:Hexane) to give **13** (48%).

[  ]D**=** -43.72 (c = 1.09, EtOH) - 1H-NMR ( CDCl3, 200MHz ):0.12-0.13 (2s, 6H, Si(CH3)2); 0.85-0.92 (m, 12H, 4CH3, texyl);1.62 (m, 1H, CH(CH3)2); 1.97-2.15 (m, 15H, Ac); 3.04 (m, 1H, H2a); 3.5-3.6 (m, 2H, H5a, H6b); 3.72 (m, 1H, H4a); 3.76 (m, 1H, H6a,ax); 4.0-4.06 (m, 1H, H6b); 4.22-4.30 (m, 1H, H6a,eq); 4.62-4.72 ( m, 1H, H3a); 4.74-4.82 (d,1H, H1b); 4.88-4.92 ( m, 1H, H3b); 5.1-5.2 (m, 1H, H2b); 5.25-5.30 ( m, 1H, H4b); 5.32-5.40 (d, 1H, H1a); 5.50 ( s, 1H, CHPh); 5.78 (d,1H, NH, JNH-H2=7.8Hz); 7.25-7.75 (m, 5H, Ph). - 13C- NMR ( CDCl3, 50.3 MHz):18.4; 19.8; 20.5; 20.7; 23.5; 24.5; 33.8; 60.4; 60.9; 65.6; 66.7; 68.7; 69.2; 70.1; 70.9; 76.3; 76.9; 77.6; 80.9; 94.0; 95.7; 100.1; 101.4; 125.9; 128.1; 128.2; 129.1; 137.0; 169.4; 170.3.

**Synthesis of 14.**

To a cold (0°C) stirred solution of **13** ( 100 mg, 0.128 mmol ) in CH2Cl2 (1.04 ml) 60% TFA (118.2 l, 1,534 mmol) was added, and stirring was continued for 4h, monitoring by TLC (2:8 Hexane/AcOEt). The reaction was quenched by diluting with CH2Cl2 and adding a saturated NaHCO3 solution. The product was extracted with CH2Cl2, the organic phase washed with water, dried and concentrated. To a cold (0°C), stirred solution of the residue (793.6 mg, 1.147 mmol) in Ac2O (1.451 ml)was added pyridine (5.62 ml) and stirring was continued for 2 h. The reaction was monitored by TLC (2:8 AcOEt/Hexane). CH2Cl2 was then added and solution was washed with water. The organic phase was dried and concentrated. The residue was purified by flash chromatography (7:3 AcOEt:Hexane) to afford **14** (59%).

[  ]D**=** +0.6 (c=1, CHCl3) - 1H-NMR ( CDCl3, 200MHz ):0.12-0.13 (2s, 6H, Si(CH3)2); 0.85 (m, 6H, SiC(CH3)2iPr); 0.87 (d, 6H, 2CH3, J=6.9 Hz); 1.62 (m, 1H, CH(CH3)2); 1.97- 2.25 (7s, 21H, CH3COO and CH3CON); 3.25 (m, 1H, H2a); 3.69 (m,1H, H5a); 3.97(m, 1H, H5b); 4.09-4.14 (m, 2H, H5a ed H5b); 4.48 (dd, 1H,H3a, J3-4=J3-2=10Hz); 4.8 (d,1H, H1b, J1-2=7.3Hz); 4.85 (dd, 1H, H4a, J4-5 = J4-3=9.5 Hz); 4.92-5.05 (m, 2H, H3b and H2b); 5.07 (d,1H, H1a,J1-2 =7.6Hz);5.34(dd, 1H ,H4b, J4-5=10Hz, J 4-3=7.6Hz); 5.60 (d, 1H, NH, J NH-H2=7.76). - 13C-NMR (CDCl3, 50.3 MHz): -3.6; -2.2; 18.3; 19.8; 20.3; 20.4; 20.5; 23.3; 24.6; 33.9; 59.4; 61; 61.4; 62.8; 66.9; 69.3; 69.7; 70.3; 70.9; 71.6; 76.3; 76.7; 77.6; 78; 94.4; 66.8; 100.5; 169.0; 169.3; 169.9; 170.2;170.3.

**Synthesis of 8.**

To a stirred solution of **14** (537.2 mg, 0.69 mmol) in dry THF (7.24 ml), under N2 at -5°C, was added a 1M solution of TBAF in THF ( 791.8 l) and stirring was continued for 20 h. The reaction was monitored by TLC (AcOEt). Brine was added and the solution was extracted with AcOEt. The organic phase was dried and concentrated. The residue was purified by flash chromatography (AcOEt). To a solution of the product (290 mg, 0.457 mmol) in dry CH2Cl2 (2 ml) under N2, trichloroacetonitrile (202 l, 2.014 mmol) and DBU (1.37 ml, 0.01 mmol) were added. The mixture was stirred for 5 hours at room temperature and the reaction was monitored by TLC (2:8 Hexane/AcOEt). The solution was then concentrated and the residue purified by flash chromatography (2:8 Hexane:AcOEt) to give **8** (60%).

1H-NMR ( CDCl3, 200MHz ):1.72-2.20 (7s, 21H, CH3COO and CH3CON); 3.82-4.24 (m, 6H,

2H6a, 2H6b, H5a, H5b); 4.30 (ddd, 1H, H2a); 4.58 (d, 1H, H1b, J1-2=7.7 Hz); 4.90-5.11 (m, 3H, H2b, H3a, H3b); 5.15 (d, 1H, H1a J 1-2=4 Hz); 5.84 (dd, 1H, H4b); 6.25 (d, 1H, NH, JNH-H2=7.76 Hz).

**Synthesis of mimic 4.**

**Synthesis of 15:** A 0.1 M solution of TMSOTf (0.197 mL, 0.0197 mmol) in CH2Cl2 was added to a refluxing solution of **6** (40 mg, 0.0506 mmol) and **8** (51.3 mg, 0.0658 mmol) in dry CH2Cl2 (1 mL) under N2. After 1 h, the mixture was neutralised with Et3N and the solvent evaporated. The product **15** (9.2 mg, 13%) was isolated by flash chromatography (CHCl3/acetone, 8:2) and further purified by a second chromatography (toluene/acetone, 8:2). - []D20 = - 6.8 (*c* = 0.99, CHCl3). - 1H NMR (400 MHz, C6D6):  = 1.52, 1.56, 1.69, 1.71, 1.76, 1.83, 1.86, 2.01, 2.03, 2.06, 2.19 (11 s, 54 H), 1.89-5.88 [35 H, H-H COSY: 1.89 (m, 1 H, H5axc), 2.22 (m, 1 H, H3d), 2.29 (m, 1 H, H2axc), 2.5 (m, 1 H, H2eqc), 2.61 (m, 1 H, H5eqc), 3.1 (m, 1 H, H3’d), 3.23 (m, 1 H, H2a), 3.33 (m, 1 H, H1c), 3.37 (m, 1 H, H6c), 3.5 (m, 1 H, H5b), 3.62 (s, 3 H, -OMe), 3.87 (m, 1 H, H5a), 4.10 (m, 1 H, H6d), 4.13 (m, 1 H, H4c), 4.22 (m, 2 H, H6b, H6’b), 4.36 (m, 1 H, H6a), 4.42 (m, 1 H, H3c), 4.48 (m, 1 H, H9d), 4.54 (m, 1 H, H6’a), 4.56 (m, 1 H, H5d), 4.75 (m, 1 H, H9’d), 4.91 (d, 1 H, J = 7.9 Hz, H1b), 5.05 (m, 1 H, H4d), 5.15 (dd, 1 H, J1= 9.67, J2 = 9.67 Hz, H3a), 5.30 (m, 1 H, H4a), 5.31 (m, 1 H, H3b), 5.45 (d, 1 H, J = 8.26, H1a), 5.54 (m, 1 H, H4b), 5.60 (m, 1 H, H7d), 5.62 (m, 1 H, H2b), 5.88 (m, 1 H, H8d), 5.88 (m, 1 H, HNHa)]. - 13C NMR (100 MHz, HETCOR, C6D6):  = 100.66, 100.45, 76.76, 74.64, 74.19, 73.22, 72.38, 71.83, 70.70, 70.18, 70.11, 69.84, 69.45, 67.65, 67.40, 63.20, 63.00, 61.24, 58.40, 52.62, 49.38, 44.82, 40.44, 38.25, 34.41, 31.30, 28.16, 23.76, 23.00, 21.26, 20.84, 20.62, 20.43, 20.39, 19.97.

**Synthesis of 4:** 0.1 M MeONa in MeOH (0.018 mL) was added to a solution of **15** (25.4 mg, 0.018 mmol) in dry MeOH (1 mL). After stirring for 24 h at room temp. under N2, H2O (0.6 mL) was added to the reaction mixture. The solution was stirred for additional 12 h, then Amberlite IR 120 (H+ form) was added and the solvent, evaporated. The product **4** (16.5 mg, 92%) was isolated by flash chromatography (CHCl3/MeOH/H2O, 60:35:5). - []D23 = - 10.28 (c = 0.35; H2O); - 1H NMR (400 MHz, D2O):  = 1.96, 1.98 (2 s, 18 H), 1.54-4.81 [31 H, H-H COSY: 1.54 (m, 1 H, H5axc), 1.65 (m, 1 H, H2axc), 1.78 (m, 1 H, H3d), 2.03 (m, 1 H, H2eqc), 2.13 (m, 1 H, H5eqc), 2.57 (m, 1 H, H3’d), 2.57 (m, 1 H, H1c), 2.65 (m, 1 H, H6c), 3.40 (ddd, 1 H, J = 2.19, J = 5.5, J = 9.94 Hz, H5a), 3.48 (dd, 1 H, J = 7.75, J = 9.94 Hz, H2b), 3.50 (m, 1 H, H7d), 3.51 (m, 1 H, H4a), 3.60 (dd, 1 H, J = 9.94, J = 3.32 Hz, H3b), 3.65 (m, 1 H, H6b), 3.67 (m, 1 H, H5b), 3.70 (m, 1 H, H6d), 3.72 (m, 1 H, H4d), 3.73 (m, 1 H, H6a), 3.78 (m, 1 H, H8d), 3.78 (m, 1 H, H3a), 3.78 (m, 1 H, H2a), 3.83 (m, 1 H, H5d), 3.84 (m, 1 H, H6’b), 3.85 (m, 1 H, H4b), 3.91 (m, 1 H, J = 12.28, J = 2.19 Hz, H6’a), 3.96 (m, 1 H, H4c), 3.98 (m, 1 H, H3c), 4.41 (d, 1 H, J = 7.75 Hz, H1b), 4.81 (d, 1 H, J = 8.33, H1a), the signal for NeuAc H9 (H9d) could not be identified- 13C NMR (100 MHz, HETCOR, D2O):  = 104.0, 101.0, 75.8, 74.3, 74.0, 73.0, 71.2, 71.0, 68.8, 67.5, 63.5, 61.1, 53.3, 52.5, 44.6, 40.0, 39.8, 33.0, 30.0.

**Synthesis of the acceptor 7.**

To a stirred solution of **16** (400 mg, 1.25 mmol) in dry benzene (8 ml) was added, under N2, Bu2SnO (315 mg, 1.265 mmol). The mixture was refluxed for 8 h and the water was trapped interponing between the flask and the condenser a dropping funnel with pressure equalization arm, full of 4A molecular sieves. The residue (0.933 mmol) was redissolved in DME (1 ml) and, under N2, a solution of the triflate of the (*S*)-benzyllactate (307 mg, 0.98 mmol) in DME (1 ml) was added. After adding CsF (175 mg, 1.150 mmol), the reaction was stirred for 4 h monitoring by TLC (7:3 Hexane/AcOEt). Et2O was then added and the organic phase was washed with water, dried and concentrated. The crude was applied to a column of silica gel and eluted with 85:15 Benzene:Et2O, to give **7** (53%).

[]D= **+** 23.4 (c=1.17, CHCl3). - 1H-NMR (CDCl3, 300MHz):1.35-1.52 (m, 22H, 2 COOC(CH3)3, CHDH-5ax, L-CH3); 1.76(q, 1H, CHDH-2ax, J2ax-2eq=12Hz); 2.05 (dt, 1H, CHDH-2eq, J2eq-2ax=12Hz, J2eq-1=J2eq-5=4Hz); 2.25 (dt, 1H, CHDH-5eq, J5eq-5ax=14Hz, J5eq-6=J5eq-4=4Hz); 2.23 (bs, 1H, OH); 2.41 (td, 1H, CHDH-1, J1-6=13Hz, J1-2ax=12Hz, J1-2eq=4Hz); 2.85 (td, 1H, CHDH-6, J6-1=13Hz, J6-5ax=11Hz, J6-5eq=4Hz); 3.37 (m, 1H, CHDH-3); 4.05 (bs, 1H, CHDH-4); 4.19 (q, 1H, L-CH, J=7Hz); 5.19 (dd, 2H, OCH2Ph); 7.35 (s, 6H). - 13C-NMR (CDCl3, 50,3 MHz): 18.9, 27.8, 27.9, 32.6, 39.1, 44.3, 65.1, 66.7, 72.3,76.3, 77.0, 77.7, 80.3, 128.1, 128.5, 172.6, 174.1.

**Synthesis of mimic 5.**

**Synthesis of 17.**

### To a mixture of **7** ( 238 mg, 0.497 mmol) and **8** ( 194 mg, 0.248 mmol) ground molecular sieves (100 mg) were added and the mixture was dried *in vacuo* overnight. Under N2, dry CH2Cl2 ( 4.2 ml) was added and the solution stirred for 20 min. TfOH ( 2.2 ml, 0.024 mmol) was added and stirring was continued at room temperature until TLC reveals the disappearance of the trichloroacetimidate and appearance of the corresponding oxazoline (ca. 1h). At this stage, more TfOH ( 2.2 ml, 0.024 mmol) was added and the solution refluxed for 20 h. Reaction was monitored by TLC (4:6 Hexane/AcOEt). The solution wad neutralized by adding triethylamine and concentrated. The product **17** (20%) was isolated by flash chromatography (35:65 Hexane:AcOEt), and further purified with a second chromatography (7:3 Toluene:Acetone).

[  ]D=-13.2(c=0.6, CHCl3). - 1H-NMR (C6D6, 400MHz):1.3 (d, 3H, LH-CH3, J CH3-H1=6.8 Hz); 2.1-2.25 (m, 2H, CHD2ax, CHD2eq); 2.72 (dt, 1H, CHD1, JH1-H2ax= JH1-H6=12.8Hz , JH1- H2eq=3.7 Hz); 3.1 (m, 1H, CHD3); 3.37 (m, 1H, CHD6, JH6-H1=JH6-H5ax=11.6 Hz, JH1-H5eq=4 Hz); 3.55 (m, 1H, H5b); 3.78 (q, 1H, H5a, J5-6b=3.5 Hz); 3.88(dt, LH- CH, JCH3-HL=6.8 Hz); 4.37-4.52 (m, 2H, H6a, , J6a-5=5 Hz, J6a-6b=12 Hz, J6b-5= 3.4 Hz); 4.63 (t, 1H, H3a, JH3-H2=8.4 Hz); 5.34 (dd, 1H, H3b, J H3-H2=10.47 Hz, JH3-H4= 3.44 Hz); 5.65(dd, 1H, H2b); 5.58 (d, 1H, H4a, JH4-H3=JH4-H5=3.44 Hz); 6.3 (m, 1H, NH). - 13C-NMR (CHCl3, 100 MHz): 19; 29; 34; 40.5; 43; 57; 63.8; 67.5; 68; 70; 70.5; 71; 72; 73; 74; 78; 79; 110; 120.

**Synthesis of 5.**

A solution of **17** (55 mg, 0.051 mmol) in dry MeOH ( 1.5 ml) was shaken under H2 for 3 h, at room temperature, in the presence of Pd-C. The reaction was monitored by TLC (8:2 CHCl3/Acetone). The suspension was filtered through a pad of celite, the solids were thoroughly washed with MeOH and the filtrate and washings were combined and concentrated. The concentrate was applied to a column of silica gel and eluted with 9:1 CHCl3:MeOH. The residue ( 25.5 mg, 0.025 mmol) was dissolved in MeOH dry (3.06 ml), under N2. To the solution was then added 1M methanolic sodium methoxide ( 52 l, 0.05 mmol) and stirring was continued, at room temperature for 24 h. The reaction was monitored by TLC (60:35:5 CHCl3/MeOH/H2O). Amberlite IR-120 was added, then the resin was removed by filtration and the solution was concentrated. The residue was purified by flash chromatography (60:35:5 CHCl3:MeOH:H2O), to give **5** (70%).

[  ]D**=** -1.38 (c=0.97, MeOH) - MS (FAB+):[ M+ H+ ]= 754 - 1H-NMR (D2O, 400MHz):1.28 (d, 3H, LH-CH3, JCH3-H=6.8Hz); 1.53-2.2 (dt, 2H, CHD5, JH2eq-H2ax=14.1Hz, JH2eq-H1=JH2eq-H3=3.9Hz); 1.57-2.07 (m, 2H, CHD2); 2.45 (dt, 1H, CHD1, J H1-H2=3.7Hz, JH1-H6=JH1-H2=12.2Hz); 2.72 (dt, 1H, CHD6, JH6-H5=3.3Hz, JH6-H1=12.3Hz);3.48 (m, 1H, H5a); 3.49 (t, 1H, H2b, JH2-H1= 7.74Hz); 3.5 (m, 1H, CHD3); 3.6 (dd, 1H, H3b, JH3-H2=9.94Hz,JH3-H4=3.4 Hz);3.7-3.92 (m, 2H, H6a);3.75 (m, 3H, H6a, H3b); 3.7 (dt, 1H, H5b, JH5-H4=2Hz, JH5-CH2=12.42Hz); 3.82 (dt, 1H, H2a, JH2-H1=JH2-H3=8.46Hz); 3.86 (m,1H, H4b); 4.06(q1H, LH-CH, JH-CH3=6.8Hz); 4.3 (m,1H, CHD4); 4.4 (d, 1H,H1b, JH1-H2=7.74Hz); 4.92 (d,1H, H1a, JH1-H2=8,44Hz). - 13C-NMR (CDCl3, 100 MHz):18.9; 28.5; 33; 41; 45; 55.17; 61.5; 68.8; 69; 71; 73; 74.2; 75.6; 76; 77; 82.5; 101; 104.

**NMR Studies of 4, 5 and the CTB5:5 complex.**

# Spectral data for compound 4 (D2O, 300 K)

|  | 1H (ppm) | J (Hz) | 13C (ppm) |
| --- | --- | --- | --- |
| G1 | 4.41 | 7.75 | 104 |
| G2 | 3.48 | 7.75; 9.94 | 71 |
| G3 | 3.6 | 9.94; 3.32 | 73 |
| G4 | 3.85 |  | 68.8 |
| G5 | 3.67 |  |  |
| G6a | 3.65 |  | 63.5 |
| G6b | 3.84 |  | 63.5 |
| GCN1 | 4.81 | 8.33 | 101 |
| GCN2 | 3.78 |  | 52.5 |
| GCN3 | 3.78 |  |  |
| GCN4 | 3.51 |  | 71 |
| GCN5 | 3.4 | 2.19; 5.5; 9.94 | 75.8 |
| GCN6a | 3.73 |  | 61.1 |
| GCN6b | 3.91 | 12.28; 2.19 | 61.1 |
| D1 | 2.57 |  | 44.6 |
| D2eq | 2.03 |  | 30 |
| D2ax | 1.65 |  | 30 |
| D3 | 3.98 |  | 74.3 |
| D4 | 3.96 |  | 74.3 |
| D5eq | 2.13 |  | 33 |
| D5ax | 1.54 |  | 33 |
| D6 | 2.65 |  | 39.8 |
| S3 | 1.78-2.57 |  | 40 |
| S4 | 3.72 |  | 67.5 |
| S5 | 3.83 |  | 53.3 |
| S6 | 3.7 |  | 74 |
| S7 | 3.5 |  | 71 |
| S8 | 3.78 |  | 71.2 |
| S9 |  |  |  |
| CH3glc | 1.96  |  |  |
| CH3·sial | 1.98  |  |  |

Observed NOE contacts in 4

| GCN1 | D4 3.96 | strong | D3 | D1 2.57 | medium |
| --- | --- | --- | --- | --- | --- |
|  | GCN5 3.4 | medium |  | D2eq 2.03 | medium |
|  | GCN3 3.78 | weak* |  | D5ax 1.54 | medium |
|  | 3.51 | medium |  | S3ax 1.78 | medium |
| G1 | GCN3 3.78 | strong |  |  |  |
|  | G3 3.6 | medium |  |  |  |
|  | G5 3.67 | strong |  |  |  |

* since GCN3 e GCN2 are isochronous, the small NOE intensity may originate from the sum of a strong negative crosspeak with GCN3 and a positive cross peak (Hart. Hann) with GCN2.

#

# Spectral data for compound 5 (D2O, 300 K)

|  | 1H (ppm) | J (Hz) | 13C (ppm) |
| --- | --- | --- | --- |
| G1 | 4.41 | 7.74 | 104 |
| G2 | 3.49 | 7.7 | 71 |
| G3 | 3.6 | 9.94; 3.4 | 73 |
| G4 | 3.86 |  | 69 |
| G5 | 3.7 | 12.42; 2 | 76 |
| G6a | 3.75 |  | 61.5 |
| G6b | 3.75 |  | 61.5 |
| GCN1 | 4.92 | 8.44 | 101 |
| GCN2 | 3.82 | 8.46 | 55 |
| GCN3 | 3.75 |  | 82.5 |
| GCN4 | 3.51 |  | 69 |
| GCN5 | 3.48 |  | 76 |
| GCN6a | 3.7 |  | 61.5 |
| GCN6b | 3.92 |  | 61.5 |
| D1 | 2.45 | 12.2; 3.7 | 45 |
| D2eq | 2.07 | 14.1; 3.9 | 28.5 |
| D2ax | 1.57 |  | 28.5 |
| D3 | 3.5 |  | 77 |
| D4 | 4.3 |  | 73 |
| D5eq | 2.2 |  | 33 |
| D5ax | 1.53 |  | 33 |
| D6 | 2.72 | 12.3; 3.3 | 41 |
| HL | 4.05 | 6.8 | 74 |
| CH3(L) | 1.28 | 6.8 | 19 |

**Experimental NOE contacts of 5**

| Free state | | | Bound statea | | |
| --- | --- | --- | --- | --- | --- |
| GCN1 4.92 | D4 4.3 | strong | GCN1 4.85 | D4 4.2 | strong |
|  | HL 4.05 | medium/weak |  |  | *not present* |
|  | CH3(L) 1.28 | medium |  |  | *not present* |
|  | GCN5 3.48 | strong |  | GCN5 3.37 | strong |
|  | GCN3 3.75 | strong |  | GCN3 3.65 | strong |
| G1 4.41 | GCN3 3.75 | strong | G1 4.32 | GCN3 3.65 | strong |
|  | G3 3.6 | strong |  | G5 3.6 | strong |
|  | G5 3.7 | strong |  | G3 3.51 | strong |
| D4 4.3 | GCN1 4.92 | strong/medium | D4 4.2 | GCN1 4.85 | strong |
|  | HL 4.05 | strong |  |  | *not present* |
| HL 4.05 | D3 3.5 | strong | HL 3.9 | D3 3.38 | medium |
|  | D2eq 2.07 | medium/weak |  | D2eq 1.98 | strong |
|  | GCN1 4.92 | medium/weak |  |  | *not present* |
|  | D4 4.3 | strong |  |  | *not present* |
|  | CH3(L) | strong |  |  |  |
| CH3(L) | D3 | strong | CH3(L) | D3 | medium |
|  | GN1 | medium |  |  |  |

a. The chemical shifts of the ligand protons are all shifted upfield by ca. 0.1 ppm

**Figure SupData 1:** Fluorescence emission spectra of CTB5 (0.5M) titrated with **4**.

**Figure SupData 2:** Fluorescence emission spectra of CTB5 (0.5M) titrated with **5**.

**Figure SupData 3:** Wavelength titrations of CTB5 (0.1 M) with o-GM1 **1** (black square, dotted line); ps-GM1 **2** (empty circles, solid line). The wavelength variation of the maximum fluorescence emission ( has been plotted against the total concentration of the ligands(nM). No wavelength variation is observed titrating CTB5 with **4**.
